# Supplementary material
Source: ML conference proceedings conference paper supplement (https://proceedings.neurips.cc/paper_files/paper/2020/hash/912d2b1c7b2826caf99687388d2e8f7c-Abstract.html)
Supplement: Supplementary file [file 912d2b1c7b2826caf99687388d2e8f7c-Supplemental.pdf]

---

# Supplementary Material: Progressive Kernel Based Knowledge Distillation for Adder Neural Networks

---

Yixing Xu<sup>†</sup>, Chang Xu<sup>‡</sup>, Xinghao Chen<sup>†</sup>, Wei Zhang<sup>†</sup>, Chunjing Xu<sup>†</sup>, Yunhe Wang<sup>†</sup>

<sup>†</sup>Noah's Ark Lab, Huawei Technologies

<sup>‡</sup>The University of Sydney

{yixing.xu, xinghao.chen, wz.zhang, xuchunjing, yunhe.wang}@huawei.com  
c.xu@sydney.edu.au

## 1 Proof of Theorem 1

Given two input vector  $\mathbf{x}$  and  $\mathbf{f}$ , the result of convolutional operation on a specific point of the image is the dot product of two vectors. Thus, Eq.(7) in the main paper can be written as:

$$\begin{aligned} e^{-\frac{\mathbf{x} \cdot \mathbf{f}}{2\sigma^2}} &= e^{-\frac{\mathbf{x}^\top \mathbf{f}}{2\sigma^2}} = \sum_{n=0}^{\infty} \frac{\left(-\frac{\mathbf{x}^\top \mathbf{f}}{2\sigma^2}\right)^n}{n!} \quad (\text{Taylor series expansion}) \\ &= \sum_{n=0}^{\infty} P_n \frac{(\sum_{i=1}^k x_i f_i)^n}{n!} \quad (\text{denote } P_n = \left(-\frac{1}{2\sigma^2}\right)^n). \end{aligned} \quad (1)$$

Given the polynomial expansion theorem  $(\sum_{i=1}^k x_i)^n = \sum_{l=1}^L \frac{n!}{n_{l_1}! n_{l_2}! \dots n_{l_k}!} x_1^{n_{l_1}} x_2^{n_{l_2}} \dots x_k^{n_{l_k}}$ , in which  $\sum_{i=1}^k n_{l_i} = n$ ,  $n_{l_i} \in \mathbb{N}$  and  $L = \frac{(n+k-1)!}{n!(k-1)!}$ , Eq.(1) can be expressed as:

$$\begin{aligned} e^{-\frac{\mathbf{x}^\top \mathbf{f}}{2\sigma^2}} &= \sum_{n=0}^{\infty} P_n \frac{(\sum_{i=1}^k x_i f_i)^n}{n!} \\ &= \sum_{n=0}^{\infty} P_n \frac{1}{n!} \sum_{l=1}^L \frac{n!}{n_{l_1}! n_{l_2}! \dots n_{l_k}!} (x_1 f_1)^{n_{l_1}} (x_2 f_2)^{n_{l_2}} \dots (x_k f_k)^{n_{l_k}} \\ &= \sum_{n=0}^{\infty} \sum_{l=1}^L \sqrt{\frac{P_n}{n_{l_1}! n_{l_2}! \dots n_{l_k}!}} (x_1^{n_{l_1}} x_2^{n_{l_2}} \dots x_k^{n_{l_k}}) \sqrt{\frac{P_n}{n_{l_1}! n_{l_2}! \dots n_{l_k}!}} (f_1^{n_{l_1}} f_2^{n_{l_2}} \dots f_k^{n_{l_k}}) \\ &= \sum_{n=0}^{\infty} \sum_{l=1}^L \phi_{n_l}(\mathbf{x}) \phi_{n_l}(\mathbf{f}) \quad (\text{denote } \phi_{n_l}(\mathbf{x}) = \sqrt{\frac{P_n}{n_{l_1}! n_{l_2}! \dots n_{l_k}!}} (x_1^{n_{l_1}} x_2^{n_{l_2}} \dots x_k^{n_{l_k}})) \\ &= \sum_{n=0}^{\infty} \langle \Phi_n(\mathbf{x}), \Phi_n(\mathbf{f}) \rangle \quad (\text{denote } \Phi_n(\mathbf{x}) = [\phi_n^1(\mathbf{x}), \phi_n^2(\mathbf{x}), \dots, \phi_n^L(\mathbf{x})]) \\ &= \sum_{n=0}^{\infty} \mathcal{K}_n(\mathbf{x}, \mathbf{f}). \end{aligned} \quad (2)$$

Thus, the transformation in Eq.(7) in the main paper can be expressed as a linear combination of infinite kernel functions, which means the output space is mapped to an infinite dimensional space. Also note that when  $n \rightarrow \infty$ ,  $L$  also goes to infinity, which means that the input space is mapped to an infinite dimensional space.

## 2 More Experimental Results of PKKD

In this section, more experimental results of PKKD are conducted. We compared the proposed method with other methods, such as ANN+dropout, Snapshot-KD [3], SP-KD [2], Gift-KD [4] and AT [5] on ResNet-20 using CIFAR-10 dataset as shown in Tab. 1.

Table 1: Compared with other methods on ResNet-20 using CIFAR-10 dataset.

| PKKD          | ANN + dropout | Snapshot-KD [3] | SP-KD [2] | Gift-KD [4] | AT [5] |
|---------------|---------------|-----------------|-----------|-------------|--------|
| <b>92.96%</b> | 92.20%        | 92.33%          | 92.38%    | 92.22%      | 92.27% |

Then, we show the superiority of the proposed methods on the traditional CNN distillation. We compared the proposed method with vanilla KD [1] on ImageNet dataset using ResNet-152 as teacher model and ResNet-18 as student model. The results are shown in Tab. 2.

Table 2: PKKD and KD in CNN distillation.

| Model          | Top-1 acc    | Top-5 acc    |
|----------------|--------------|--------------|
| ResNet-18      | 69.8%        | 89.1%        |
| PKKD           | <b>73.1%</b> | <b>91.3%</b> |
| Vanilla KD [1] | 72.5%        | 90.9%        |

Finally, we show the experimental results of using different settings of PKKD on ImageNet with ResNet-50 in Tab. 3.

Table 3: Ablation study on ImageNet with ResNet-50. 'K / NK' stands for using kernel or not. 'P / NP' stands for using progressive or fixed teacher.

| CNN           | ANN           | K + P (PKKD)         | NK + P        | K + NP        | NK + NP       |
|---------------|---------------|----------------------|---------------|---------------|---------------|
| 76.2% / 92.9% | 74.9% / 91.7% | <b>76.8% / 93.3%</b> | 75.9% / 92.6% | 75.6% / 92.2% | 75.2% / 92.0% |

## References

- [1] Geoffrey Hinton, Oriol Vinyals, and Jeff Dean. Distilling the knowledge in a neural network. *arXiv preprint arXiv:1503.02531*, 2015.
- [2] Frederick Tung and Greg Mori. Similarity-preserving knowledge distillation. In *Proceedings of the IEEE International Conference on Computer Vision*, pages 1365–1374, 2019.
- [3] Chenglin Yang, Lingxi Xie, Chi Su, and Alan L Yuille. Snapshot distillation: Teacher-student optimization in one generation. In *Proceedings of the IEEE Conference on Computer Vision and Pattern Recognition*, pages 2859–2868, 2019.
- [4] Junho Yim, Donggyu Joo, Jihoon Bae, and Junmo Kim. A gift from knowledge distillation: Fast optimization, network minimization and transfer learning. In *Proceedings of the IEEE Conference on Computer Vision and Pattern Recognition*, pages 4133–4141, 2017.
- [5] Sergey Zagoruyko and Nikos Komodakis. Paying more attention to attention: Improving the performance of convolutional neural networks via attention transfer. *arXiv preprint arXiv:1612.03928*, 2016.
